# Supplementary material for: New bifunctional ionic liquid-based plant systemic acquired resistance (SAR) inducers with an improved environmental hazard profile
Source: Royal Society of Chemistry journal article supplement (doi:10.1039/d1gc00107h), 2021-01-01

Electronic Supplementary Information

**New bifunctional ionic liquid-based plant systemic acquired resistance (SAR) inducers with improved environmental hazard profile**

**Marta Markiewicz<sup>a</sup>, Piotr Lewandowski<sup>b</sup>, Maciej Spsychalski<sup>b</sup>, Rafal Kukawka<sup>c</sup>, Joanna Feder-Kubis<sup>d</sup>, Stephan Beil<sup>a</sup>, Marcin Smiglak<sup>b,c\*</sup>, Stefan Stolte<sup>a\*</sup>**

<sup>a</sup> Institute of Water Chemistry, Technische Universität Dresden, D 01062, Dresden, Germany

<sup>b</sup> Poznan Science and Technology Park, Adam Mickiewicz University Foundation, ul Rubiez 46, 61-612 Poznan, Poland

<sup>c</sup> Innosil Sp z o.o., ul Rubiez 46, 61-612 Poznan, Poland

<sup>d</sup> Faculty of Chemistry, Wrocław University of Science and Technology, Wybrzeże Wyspiańskiego 27, 50-370 Wrocław, Poland

**1. Physicochemical properties of SAR inducers**

**Table S1.** Physicochemical properties of compounds included in the study (water solubility, log  $K_{ow}$ ) as well as their efficacy in inducing SAR activity

| No. | Compound                           | Experimental aqueous solubility [g/L] | Predicted aqueous solubility [g/L] | Log $K_{ow}$                                                    | SAR inducing efficiency <sup>a</sup> |
|-----|------------------------------------|---------------------------------------|------------------------------------|-----------------------------------------------------------------|--------------------------------------|
| 1   | BTH                                | 0.007 ref <sup>1</sup>                | 0.04 <sup>b</sup>                  | 2.93 [ref <sup>1</sup> ]; 2.38 <sup>b</sup> ; 2.06 <sup>c</sup> | 95 ref <sup>2</sup>                  |
| 2   | [BTHMe][LS]                        | > 10 ref <sup>1</sup>                 | 0.016 <sup>b</sup>                 | 2.95 [ref <sup>1</sup> ]; 3.59 <sup>b</sup>                     | < 10%                                |
| 3   | [BTHMe][MeSO <sub>4</sub> ]        | > 10 ref <sup>1</sup>                 | 85.1 <sup>b</sup>                  | 0.32 [ref <sup>1</sup> ]                                        | < 10%                                |
| 4   | [K][BTHCOO]                        | > 10 ref <sup>2</sup>                 | 154.2 <sup>b</sup>                 | -2.29 <sup>b</sup> ; -3.50 <sup>c</sup>                         | 85 ref <sup>2</sup>                  |
| 5   | [Chol][BTHCOO]                     | > 10 ref <sup>2,3</sup>               | 33.9 <sup>b</sup>                  | -1.56 <sup>b</sup> ; -1.08 <sup>c</sup>                         | 90 ref <sup>2</sup>                  |
| 6   | [N <sub>4444</sub> ][BTHCOO]       | > 10 ref <sup>2</sup>                 | 0.002 <sup>b</sup>                 | 4.90 <sup>b</sup> ; 4.81 <sup>c</sup>                           | 100 ref <sup>2</sup>                 |
| 7   | [N <sub>11410</sub> ][BTHCOO]      | 1.2 ref <sup>2</sup>                  | 0.005 <sup>b</sup>                 | 4.58 <sup>b</sup> ; 4.68 <sup>c</sup>                           | 95 ref <sup>2</sup>                  |
| 7a  | [N <sub>11410</sub> ][Br]          | -                                     | -                                  | 7.90 <sup>d</sup> ; 8.16 <sup>e</sup>                           |                                      |
| 8   | [N <sub>11010Benz</sub> ][BTHCOO]  | 0.08 ref <sup>2</sup>                 | 0.1 x 10 <sup>-6</sup> c           | 10.10 <sup>c</sup>                                              | 85 ref <sup>2</sup>                  |
| 8a  | [N <sub>11010Benz</sub> ][Cl]      | -                                     | -                                  | 12.75 <sup>d</sup> ; 13.05 <sup>e</sup>                         |                                      |
| 9   | [Py C <sub>10</sub> ][BTHCOO]      | 0.1 ref <sup>2</sup>                  | 0.005 <sup>b</sup>                 | 3.17 <sup>b</sup> ; 4.29 <sup>c</sup>                           | 75 ref <sup>2</sup>                  |
| 9a  | [Py C <sub>10</sub> ][Cl]          | -                                     | -                                  | 7.32 <sup>d</sup> ; 6.70 <sup>e</sup>                           |                                      |
| 10  | [Py C <sub>12</sub> ][BTHCOO]      | 0.08 ref <sup>2</sup>                 | 0.0005 <sup>b</sup>                | 4.38 <sup>b</sup> ; 5.23 <sup>c</sup>                           | 80 ref <sup>2</sup>                  |
| 10a | [Py C <sub>12</sub> ][Cl]          | -                                     | -                                  | 7.75 <sup>d</sup> ; 8.34 <sup>e</sup>                           |                                      |
| 11  | [Terpene C <sub>9</sub> ][BTHCOO]  | > 0.02 ref <sup>4</sup>               | 2.3 x 10 <sup>-6</sup> c           | 7.21 <sup>c</sup>                                               | 95 ref <sup>4</sup>                  |
| 11a | [Terpene C <sub>9</sub> ][Cl]      | -                                     | -                                  | 10.47 <sup>d</sup> ; 10.28 <sup>e</sup>                         |                                      |
| 12  | [Terpene C <sub>12</sub> ][BTHCOO] | > 0.02 ref <sup>4</sup>               | 0.7 x 10 <sup>-6</sup> c           | 8.05 <sup>c</sup>                                               | 93 ref <sup>4</sup>                  |
| 12a | [Terpene C <sub>12</sub> ][Cl]     | -                                     | -                                  | 11.93 <sup>d</sup> ; 11.61 <sup>e</sup>                         |                                      |

<sup>a</sup> SAR inducing efficiency measured against tobacco mosaic virus (TMV) in tobacco plants (*Nicotiana tabacum* L. var Xanthi) at concentration of 20mg/L

<sup>b</sup> Predicted using COSMO-RS at TZVP level (in case of ionic compounds calculations are for ion pairs)

<sup>c</sup> Predicted using COSMO-RS at SVP level (in case of ionic compounds calculations are for ion pairs)

<sup>d</sup> Predicted using COSMO-RS at TZVP level for the cation

<sup>e</sup> Predicted using COSMO-RS at SVP level for the cation

## 2. Correlation analysis in toxicity tests

Two parameters: octanol-water partition coefficient ( $\log K_{ow}$ ) and biological membrane-water partition coefficient ( $\log K_{mw}$ ) were used as descriptors of toxicity of SAR inducers toward IPC-81, *Aliivibrio fischeri* and *Daphnia magna*. The results are shown below.

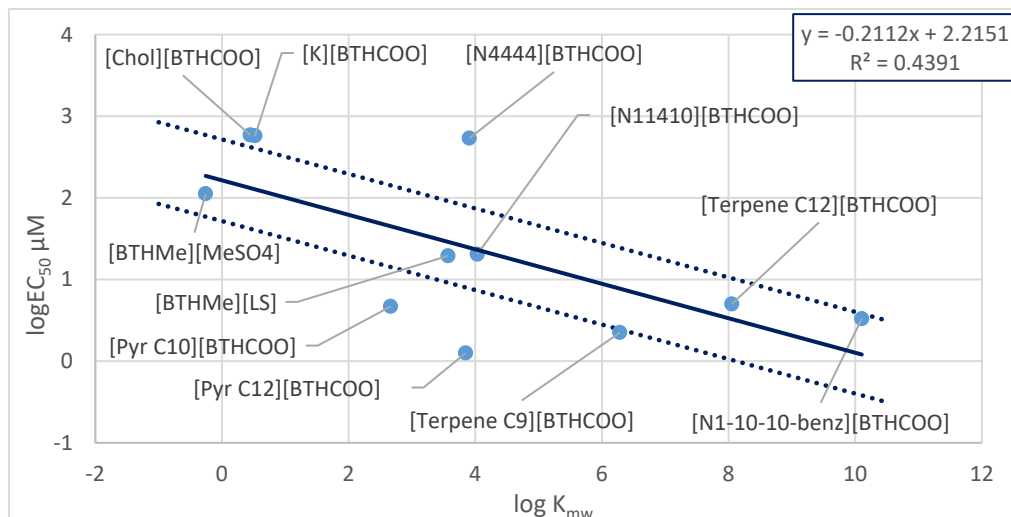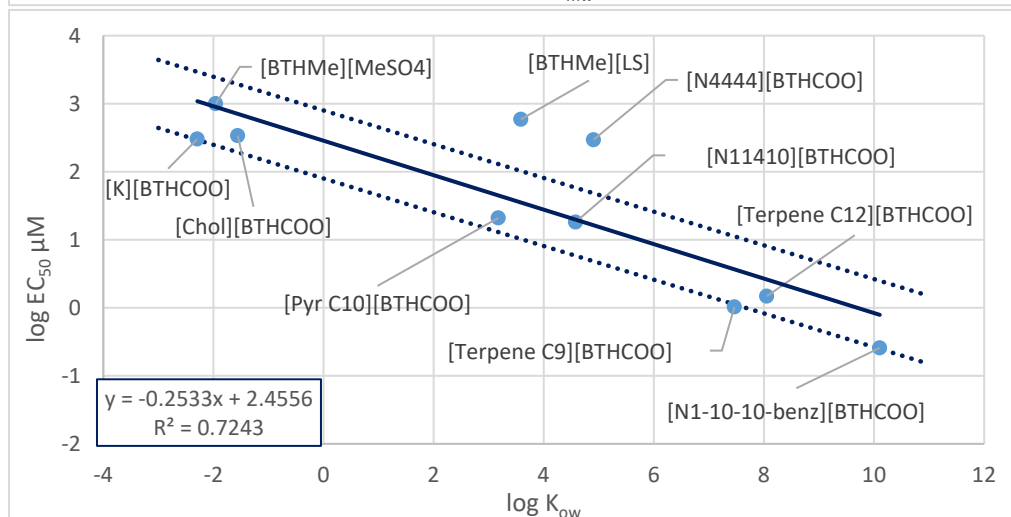

Figure S1. Correlation of effective concentration in IPC-81 test system and (a)  $\log K_{ow}$  or (b)  $\log K_{mw}$ . Solid line shows the correlation and dashed line the  $\pm 0.5$  log unit from the correlation line.

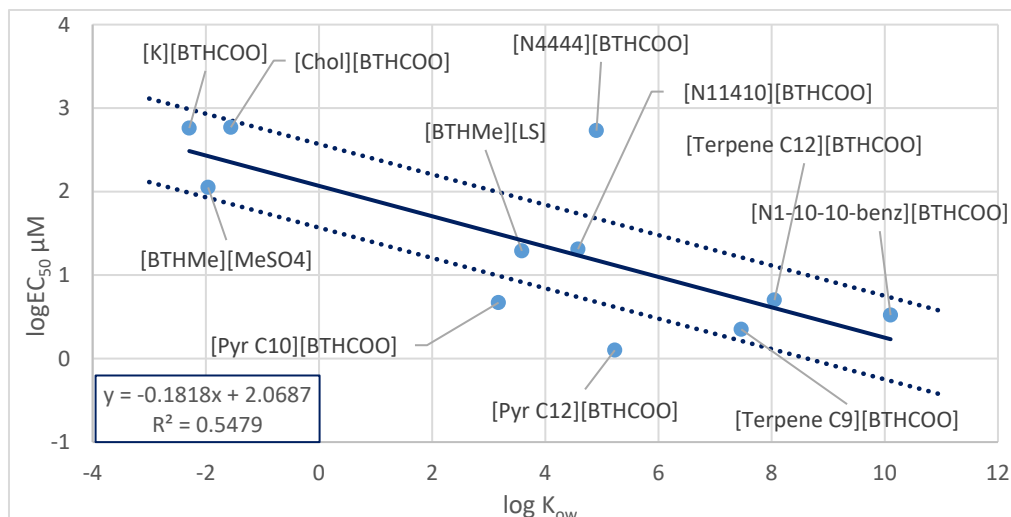

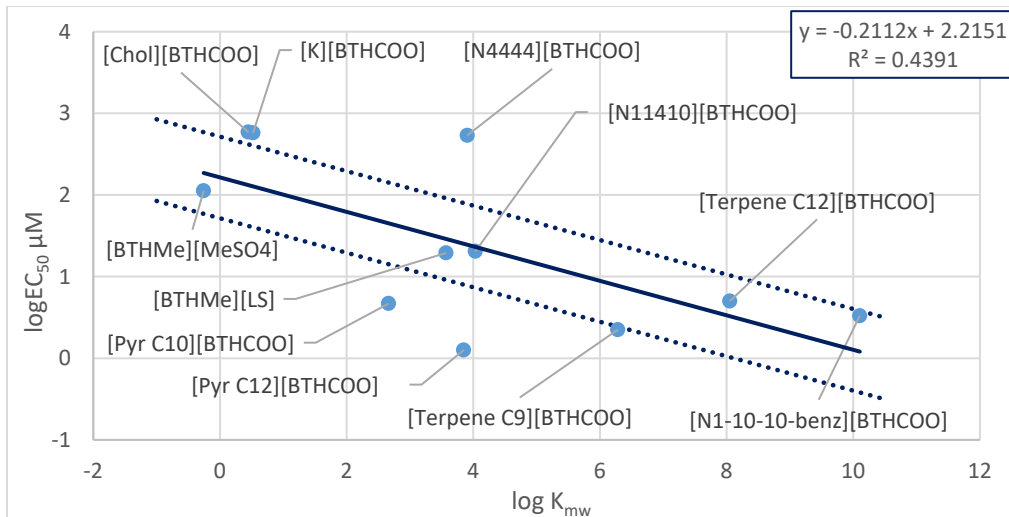

Figure S2. Correlation of effective concentration in *Aliivibrio fischeri* test system and (a) log Kow or (b) log Kmw. Solid line shows the correlation and dashed line the +/- 0.5 log unit from the correlation line.

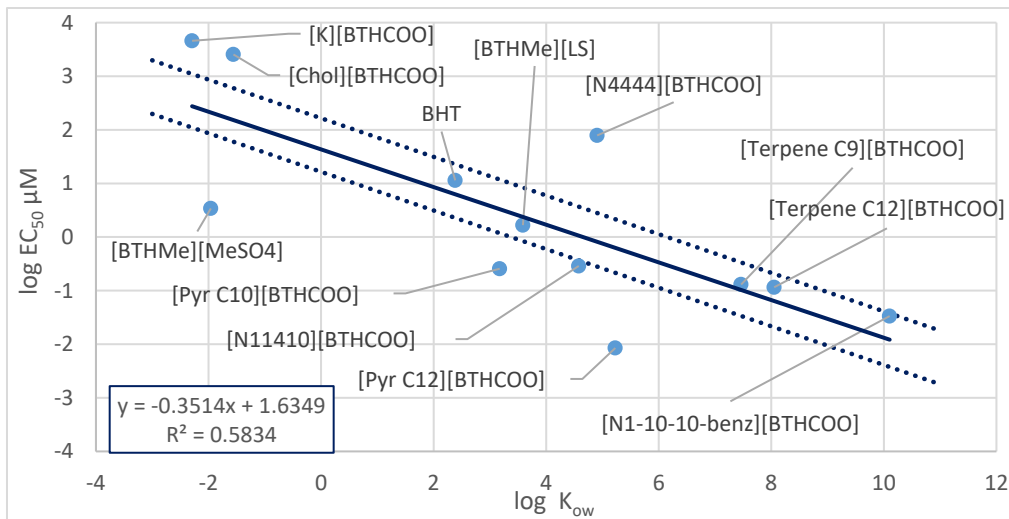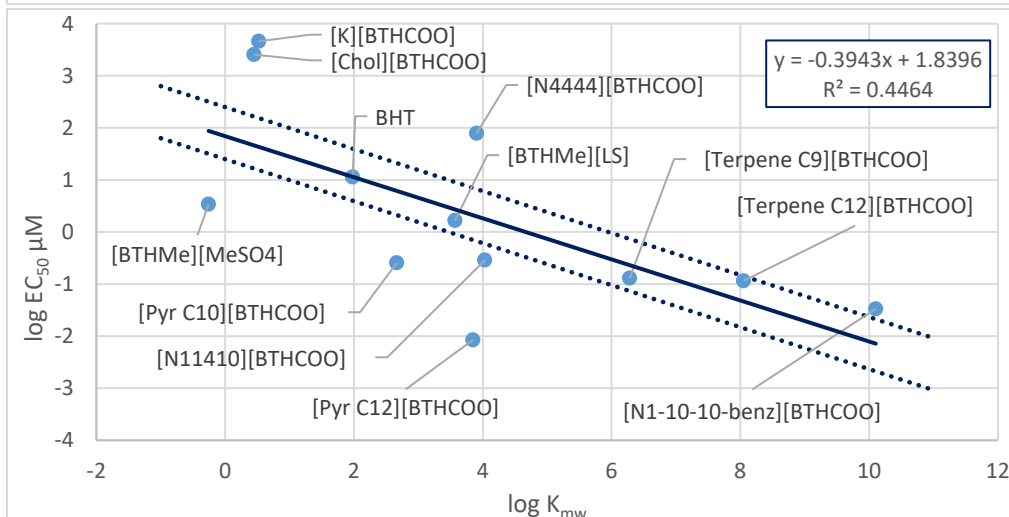

Figure S3. Correlation of effective concentration in *Daphnia magna* test system and (a) log Kow or (b) log Kmw. Solid line shows the correlation and dashed line the +/- 0.5 log unit from the correlation line.

### 3. Details of data analysis

In almost all test a monotonic dose-response curve was observed and EC<sub>50</sub> was estimated using one of two models: logit or linlogit – Table S2 presents the details of model fitting including type of model and residual sum of squares (RSS). However in several cases EC<sub>50</sub> could not be calculated:

- For BTH in IPC-81 test system and for [K][BTHCOO] in *Daphnia magna* test system there was no observable effect in any of the doses tested
- For [PyrC<sub>12</sub>][BTHCOO] a monotonic dose-response curve was observed but EC<sub>50</sub> could not be estimated

For the former two cases we tested the significance of the difference between the treatments and controls using Mann-Whitney tests. The details are shown in Table S3.

Table S2. Details of dose-response curve fitting in toxicity assessment. Model used to calculate effective concentrations and residual sum of squares are given for each compound and test systems except cases when no test was conducted or no dose-response curve was fitted. Below the table the dose-response curves are shown.

| No. | Compound                           | IPC-81                  | <i>Aliivibrio fischeri</i> | <i>Daphnia magna</i>    |
|-----|------------------------------------|-------------------------|----------------------------|-------------------------|
| 1   | BTH                                | No effect               | Not tested                 | Not tested              |
| 2   | [BTHMe][LS]                        | linlogit,<br>RSS=0.1537 | linlogit,<br>RSS=0.0134    | logit<br>RSS= 0.0925    |
| 3   | [BTHMe][MeSO <sub>4</sub> ]        | linlogit<br>RSS=0.1516  | linlogit,<br>RSS= 0.0473   | linlogit<br>RSS= 0.0608 |
| 4   | [K][BTHCOO]                        | linlogit,<br>RSS=0.0724 | linlogit,<br>RSS=0.0281    | No effect               |
| 5   | [Chol][BTHCOO]                     | linlogit<br>RSS=0.0854  | linlogit,<br>RSS=0.0204    | linlogit<br>RSS=0.1902  |
| 6   | [N <sub>4444</sub> ][BTHCOO]       | linlogit<br>RSS=0.1406  | linlogit,<br>RRS= 0.0296   | linlogit,<br>RSS=0.1769 |
| 7   | [N <sub>11410</sub> ][BTHCOO]      | linlogit,<br>RSS=0.3152 | linlogit,<br>RSS=0.0183    | linlogit,<br>RSS=0.2517 |
| 8   | [N <sub>11010Benz</sub> ][BTHCOO]  | linlogit,<br>RRS=0.1136 | linlogit,<br>RSS=0.0389    | linlogit,<br>RSS=0.1852 |
| 9   | [PyrC <sub>10</sub> ][BTHCOO]      | linlogit,<br>RRS=0.1004 | linlogit,<br>RSS=0.0384    | linlogit,<br>RSS=0.1598 |
| 10  | [PyrC <sub>12</sub> ][BTHCOO]      | No fit                  | linlogit<br>RSS=0.0187     | linlogit,<br>RSS=0.2700 |
| 11  | [TerpeneC <sub>9</sub> ][BTHCOO]   | linlogit,<br>RSS=0.1325 | linlogit,<br>RSS=0.0241    | probit,<br>RSS=0.0947   |
| 12  | [TerpeneC <sub>12</sub> ] [BTHCOO] | linlogit,<br>RSS=0.1495 | linlogit,<br>RSS=0.0530    | linlogit,<br>RSS=0.1306 |

Table S3. Results of statistical significance testing for the compounds/test for which no dose-response curve was obtained based on Mann-Whitney test.

| BTH in IPC-81 test                       |                                                            |
|------------------------------------------|------------------------------------------------------------|
| Dose [ $\mu\text{mol/L}$ ]               | p-value ( $\alpha=0.05$ ) and result of hypothesis testing |
| 0.074                                    | 0.3733, not significantly different from control           |
| 0.297                                    | 0.2975, not significantly different from control           |
| 0.149                                    | 0.0575, not significantly different from control           |
| 0.594                                    | 0.3891, not significantly different from control           |
| 1.189                                    | 0.3848, not significantly different from control           |
| 2.378                                    | 0.0220, not significantly different from control           |
| 4.755                                    | 0.0506, not significantly different from control           |
| 9.51                                     | 0.2021, not significantly different from control           |
| 19.2                                     | 0.1793, not significantly different from control           |
| [K][BTHCOO] in <i>Daphnia magna</i> test |                                                            |
| Dose [mg/L]                              | p-value ( $\alpha=0.05$ ) and result of hypothesis testing |
| 1.0                                      | not significantly different from control                   |
| 4.0                                      | p=0.4237, not significantly different from control         |
| 21                                       | not significantly different from control                   |
| 40                                       | not significantly different from control                   |
| 100                                      | NA                                                         |
| 125                                      | p=0.4237, not significantly different from control         |
| 200                                      | NA                                                         |
| 250                                      | not significantly different from control                   |
| 500                                      | not significantly different from control                   |
| 1000                                     | p=0.4237, not significantly different from control         |

#### 4. Dose-response curves

##### IPC-81

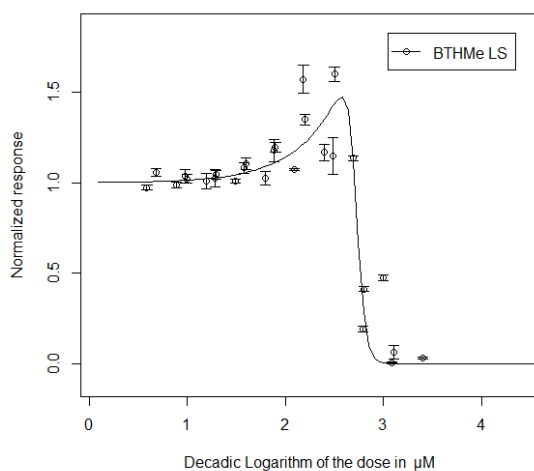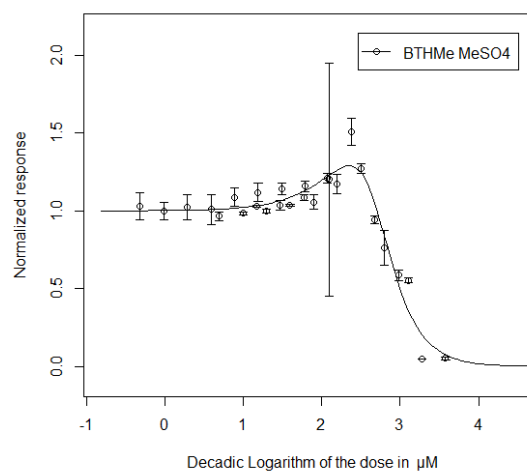

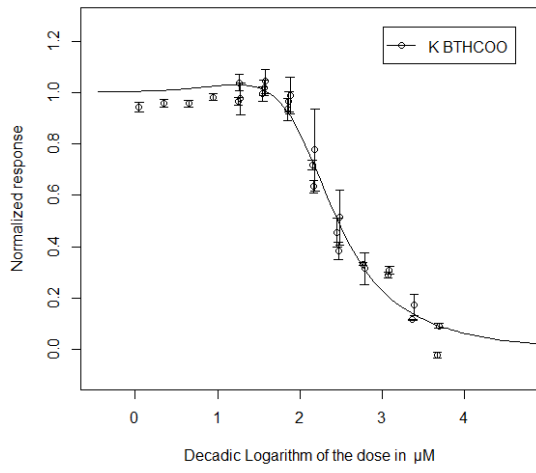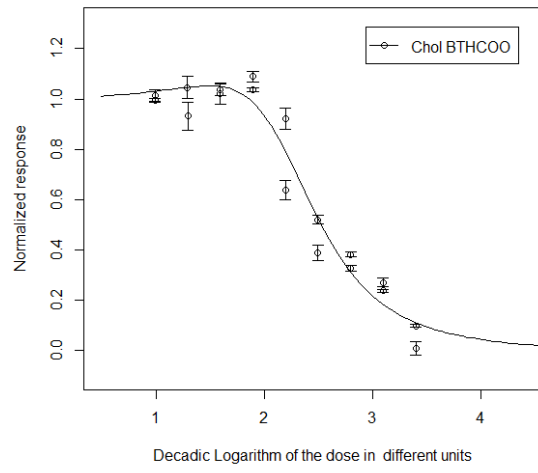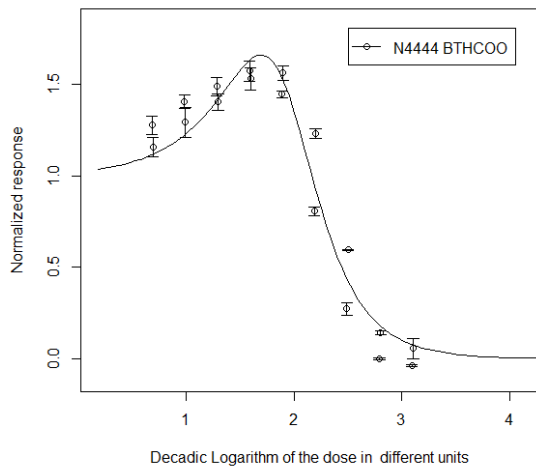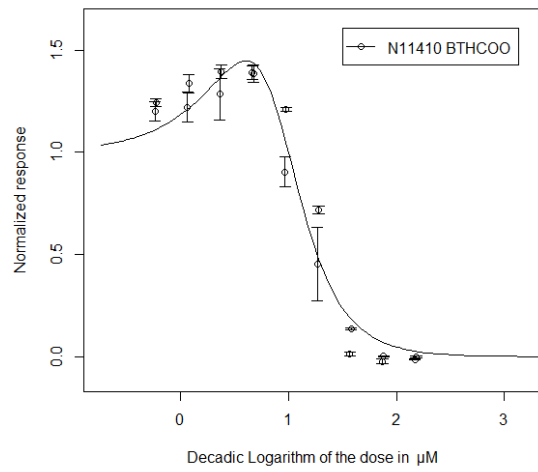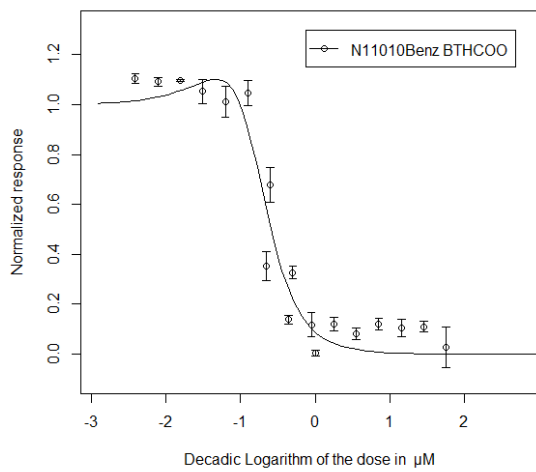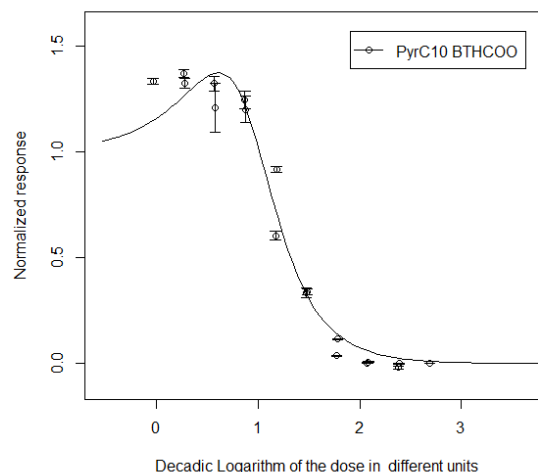

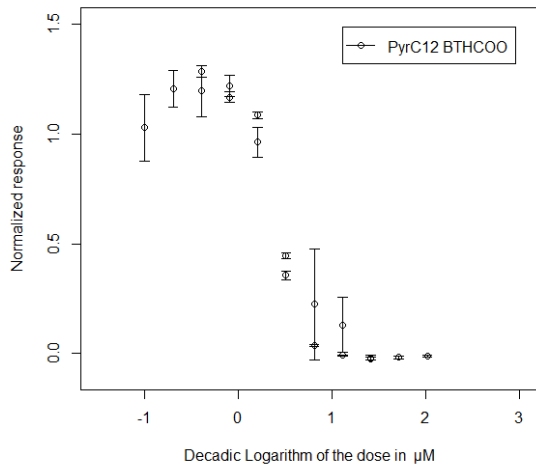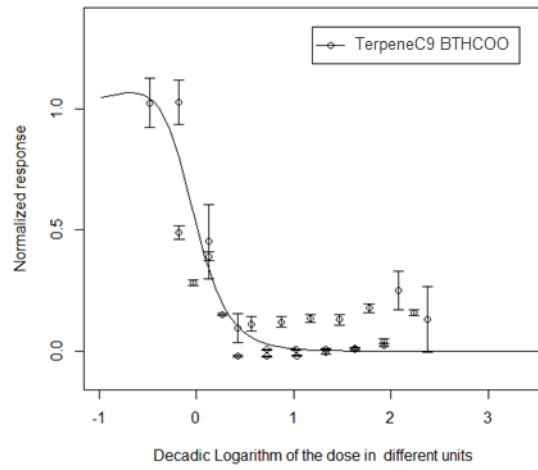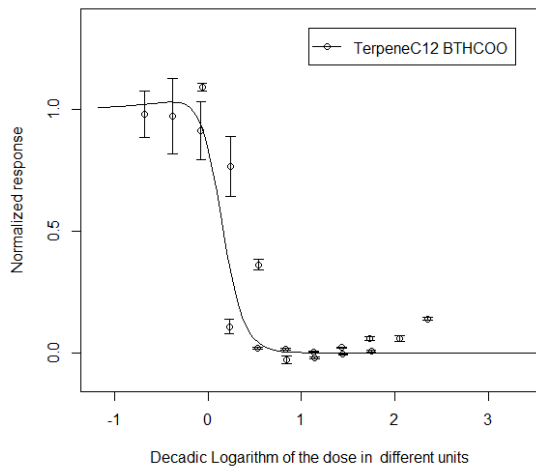

***Aliiviibrio fischeri***

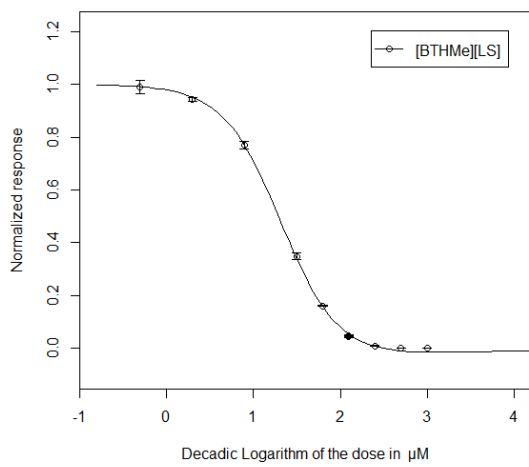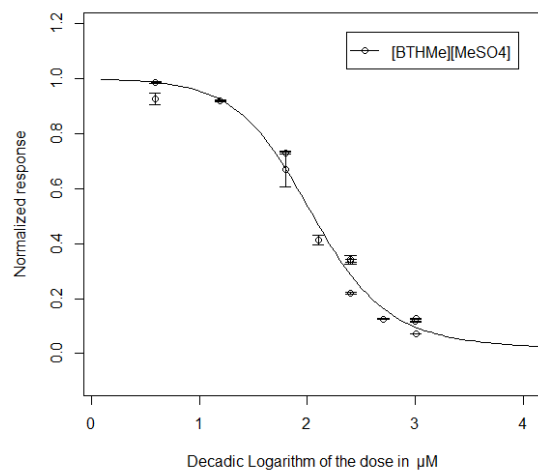

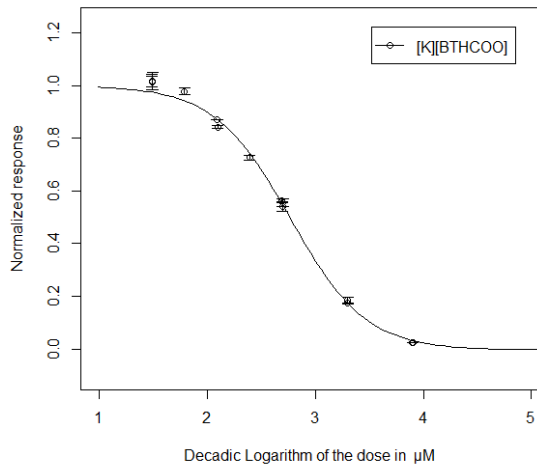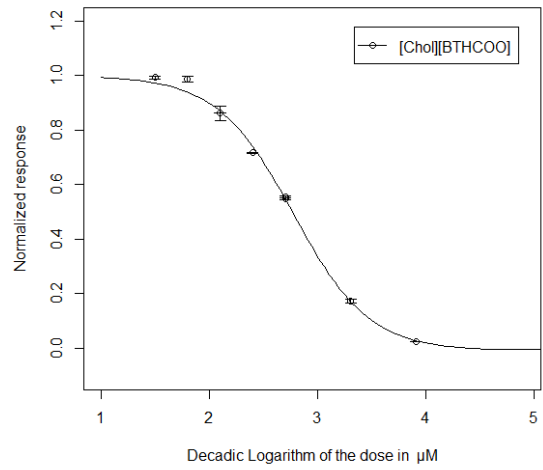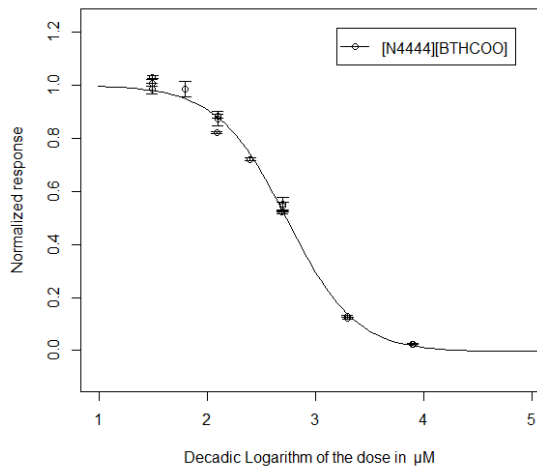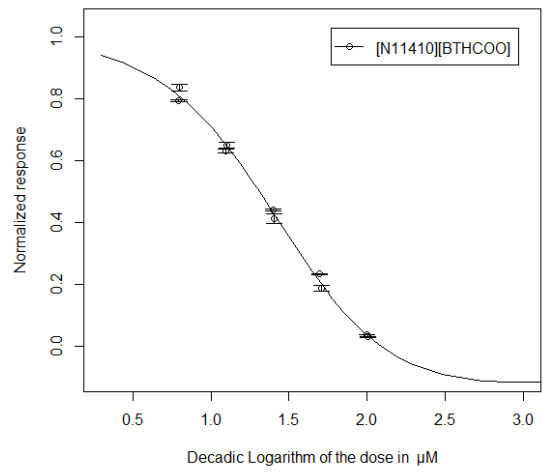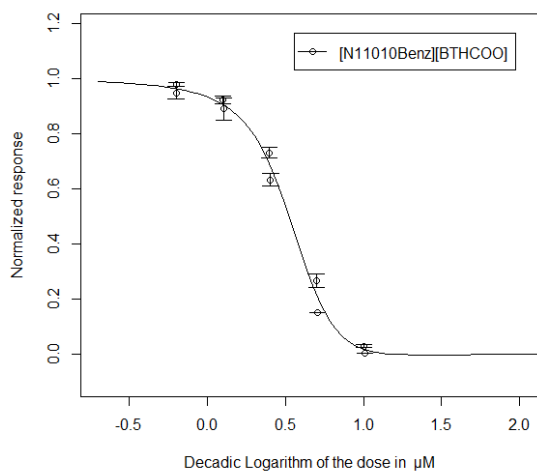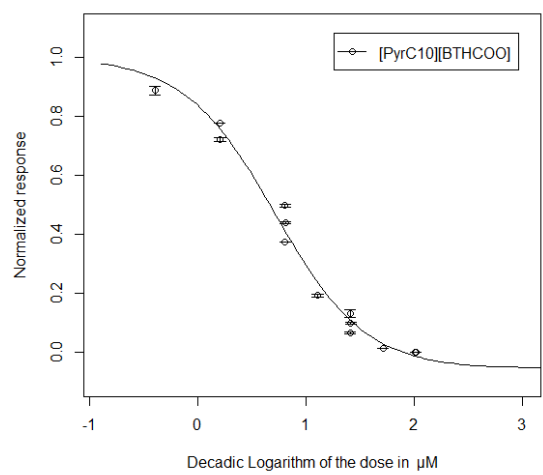



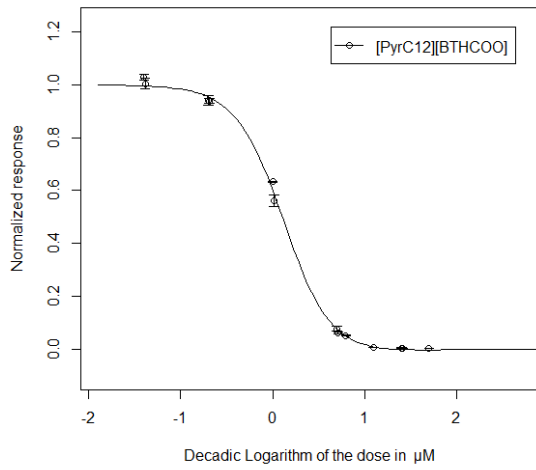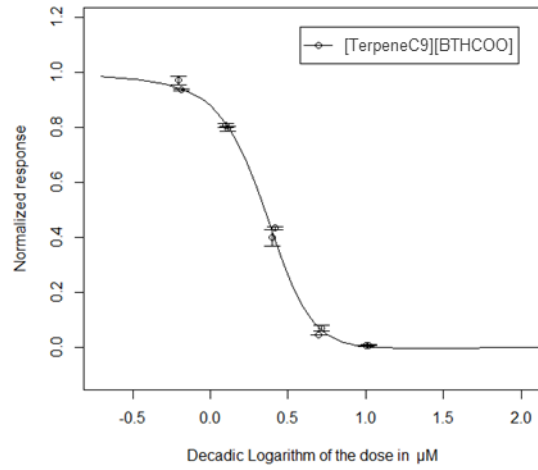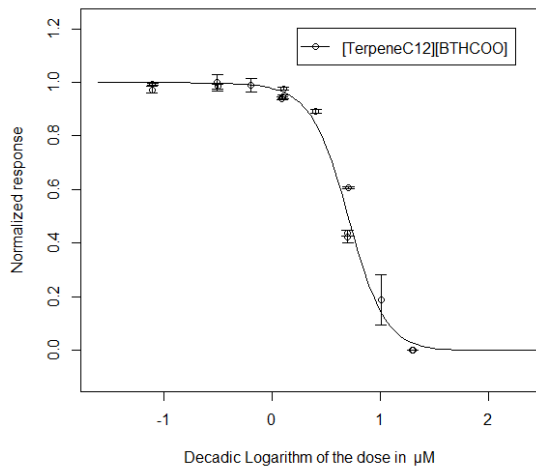

### *Daphnia magna*

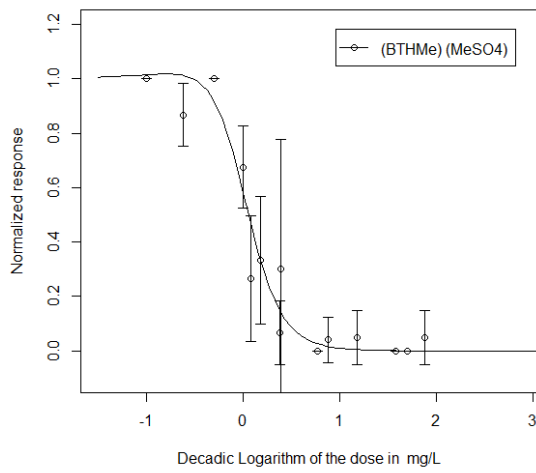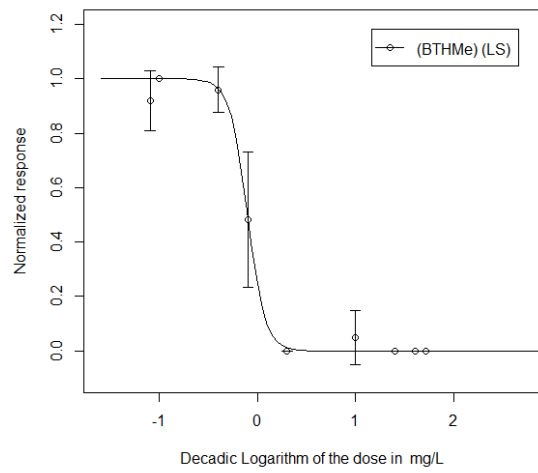

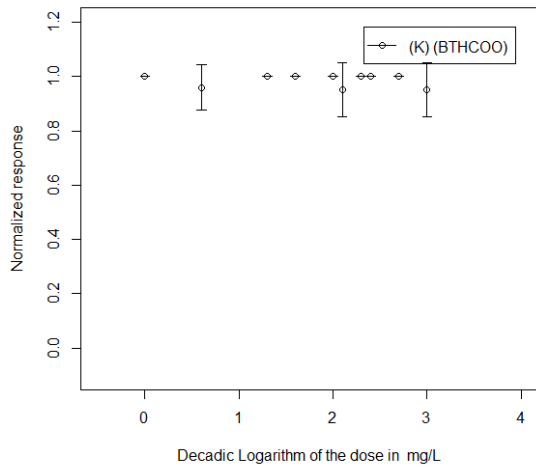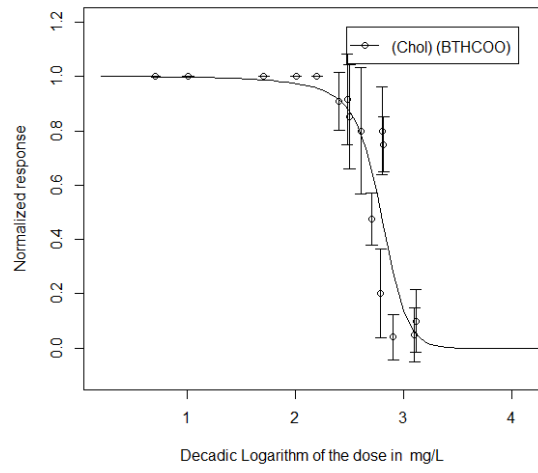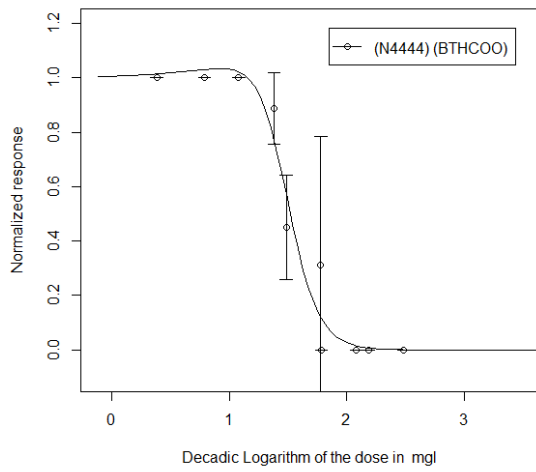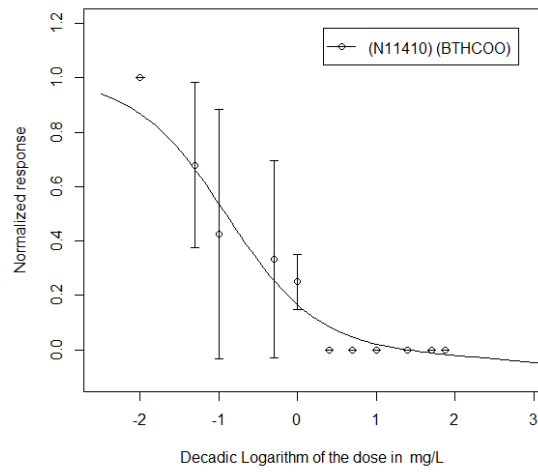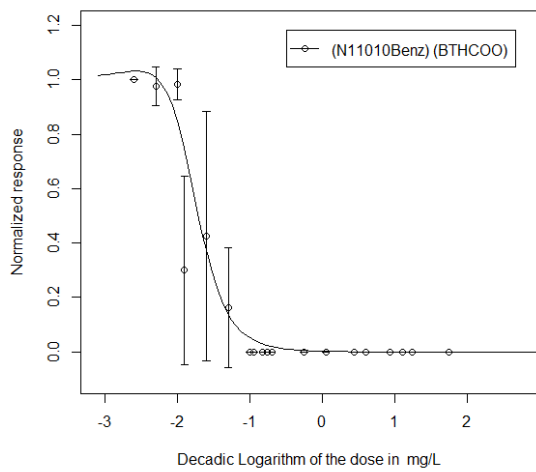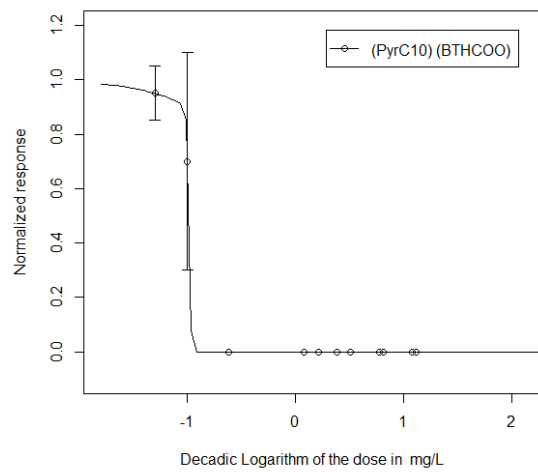

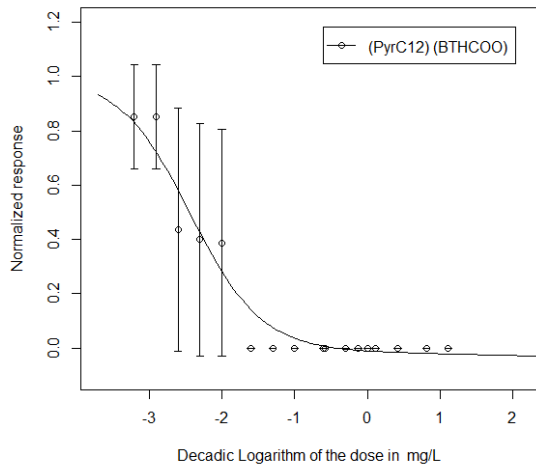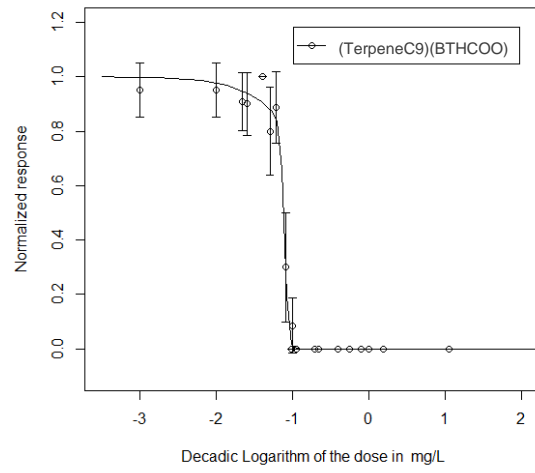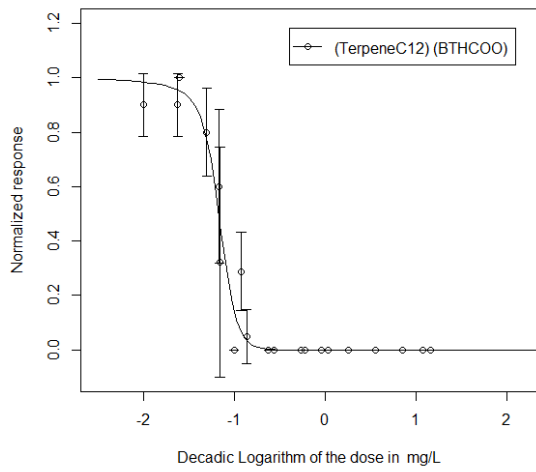

Supplement: d1gc00107h1.pdf [file d1gc00107h1.pdf]
